# Supplementary material
Source: PubMed Central journal article supplement (PMC7035916)
Supplement: zii999093020s1.pdf [file zii999093020s1.pdf]

| Supplemental Table 1. Bacterial Strains |                                                                                                                                                                                                                                                           |               |           |
|-----------------------------------------|-----------------------------------------------------------------------------------------------------------------------------------------------------------------------------------------------------------------------------------------------------------|---------------|-----------|
| Descriptive name                        | Genotype                                                                                                                                                                                                                                                  | Strain Number | Source    |
| CO92 Lux <sub>P<sub>cysZK</sub></sub>   | CO92 pCD1+, pgm+, pMT+, pst+, Lux <sub>P<sub>cysZK</sub></sub>                                                                                                                                                                                            | MBLYP043      | (1)       |
| CO92 T3+                                | MBLYP043 pgm-                                                                                                                                                                                                                                             | YPA143        | This work |
| CO92 T3-                                | CO92 pCD1-, pgm+, pMT+, pst+, Lux <sub>P<sub>tolC</sub></sub>                                                                                                                                                                                             | YPA050        | (2)       |
| KIM T3+                                 | KIM1001 pCD1+, pgm-, pMT+, pst+                                                                                                                                                                                                                           | JG150A        | (3)       |
| KIM T3-                                 | KIM1001 pCD1-, pgm-                                                                                                                                                                                                                                       | JG152B        | This work |
| KIM T3E-                                | KIM1001 pCD1+ ( <i>yopH</i> <sup>Δ3-467</sup> <i>yopE</i> <sup>Δ40-197</sup> <i>yopK</i> <sup>Δ4-181</sup> <i>yopM</i> <sup>Δ3-408</sup> <i>ypkA</i> <sup>Δ3-731</sup> <i>yopJ</i> <sup>Δ4-288</sup> <i>yopT</i> <sup>Δ3-320</sup> ), pgm-, pMT1+, pPCP1+ | JG714         | This work |
| +A                                      | JG917::+ <i>ypkA</i>                                                                                                                                                                                                                                      | JG730         | (3)       |
| +E                                      | JG917::+ <i>yopE</i>                                                                                                                                                                                                                                      | JG733         | (3)       |
| +H                                      | JG917::+ <i>yopH</i>                                                                                                                                                                                                                                      | JG734         | (3)       |
| +J                                      | JG917::+ <i>yopJ</i>                                                                                                                                                                                                                                      | JG735         | (3)       |
| +K                                      | JG917::+ <i>yopK</i>                                                                                                                                                                                                                                      | JG736         | (3)       |
| +M                                      | JG917::+ <i>yopM</i>                                                                                                                                                                                                                                      | JG732         | (3)       |
| +T                                      | JG917::+ <i>yopT</i>                                                                                                                                                                                                                                      | JG708         | (3)       |
| ΔA                                      | JG150A Δ <i>ypkA</i>                                                                                                                                                                                                                                      | JG593         | (3)       |
| ΔE                                      | JG150A Δ <i>yopE</i>                                                                                                                                                                                                                                      | JG517         | (3)       |
| ΔH                                      | JG150A Δ <i>yopH</i>                                                                                                                                                                                                                                      | JG589         | (3)       |
| ΔJ                                      | JG150A Δ <i>yopJ</i>                                                                                                                                                                                                                                      | JG525         | (3)       |
| ΔK                                      | JG150A Δ <i>yopK</i>                                                                                                                                                                                                                                      | JG523         | (3)       |
| ΔM                                      | JG150A Δ <i>yopM</i>                                                                                                                                                                                                                                      | JG583         | (3)       |
| ΔT                                      | JG150A Δ <i>yopT</i>                                                                                                                                                                                                                                      | JG713         | (3)       |

## REFERENCES

1. Sun Y, Connor MG, Pennington JM, Lawrenz MB. 2012. Development of bioluminescent bioreporters for in vitro and in vivo tracking of *Yersinia pestis*. PLoS One 7:e47123.
2. VanCleave TT, Pulsifer AR, Connor MG, Warawa JM, Lawrenz MB. 2017. Impact of Gentamicin Concentration and Exposure Time on Intracellular *Yersinia pestis*. Front Cell Infect Microbiol 7:505.
3. Palace SG, Proulx MK, Szabady RL, Goguen JD. 2018. Gain of Function Analysis Reveals Important Virulence Roles for the *Yersinia pestis* Type III Secretion System Effectors YopJ, YopT, and YpkA. Infect Immun doi:10.1128/iai.00318-18.

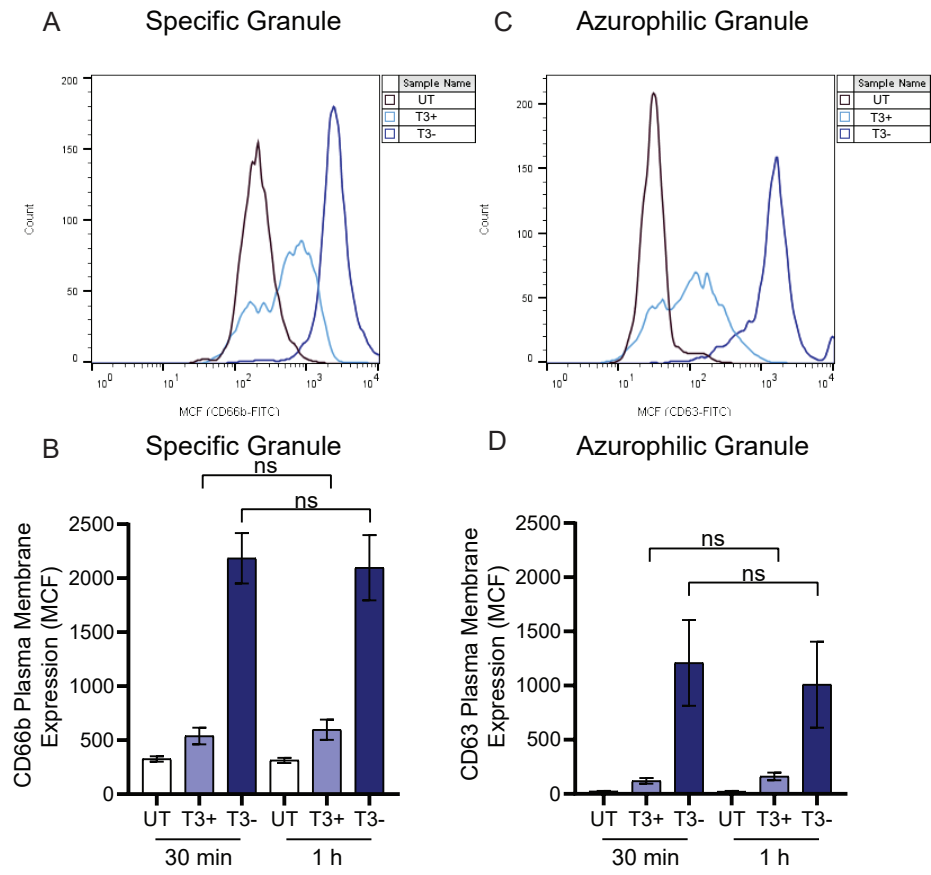

Sup. Fig. 1

**Supplemental Figure 1. Degranulation of specific and azurophilic granules peaks by 30 min post-infection.**  $4 \times 10^6$  human neutrophils were infected with *Y. pestis* CO92 with or without the pCD1 plasmid encoding the T3SS (T3+ or T3-, respectively); MOI of 100. Degranulation of (A and B) specific and (C and D) azurophilic granules was measured 30 min and 1 h post-infection by flow cytometer. (A) and (C) Representative histogram for one experiment from (B) and (D) respectively. For (B) and (D) Mean  $\pm$ SEM from 4 biologically independent experiments. One-way ANOVA with Sidak's post-hoc; ns = not significant. UT = untreated cells.

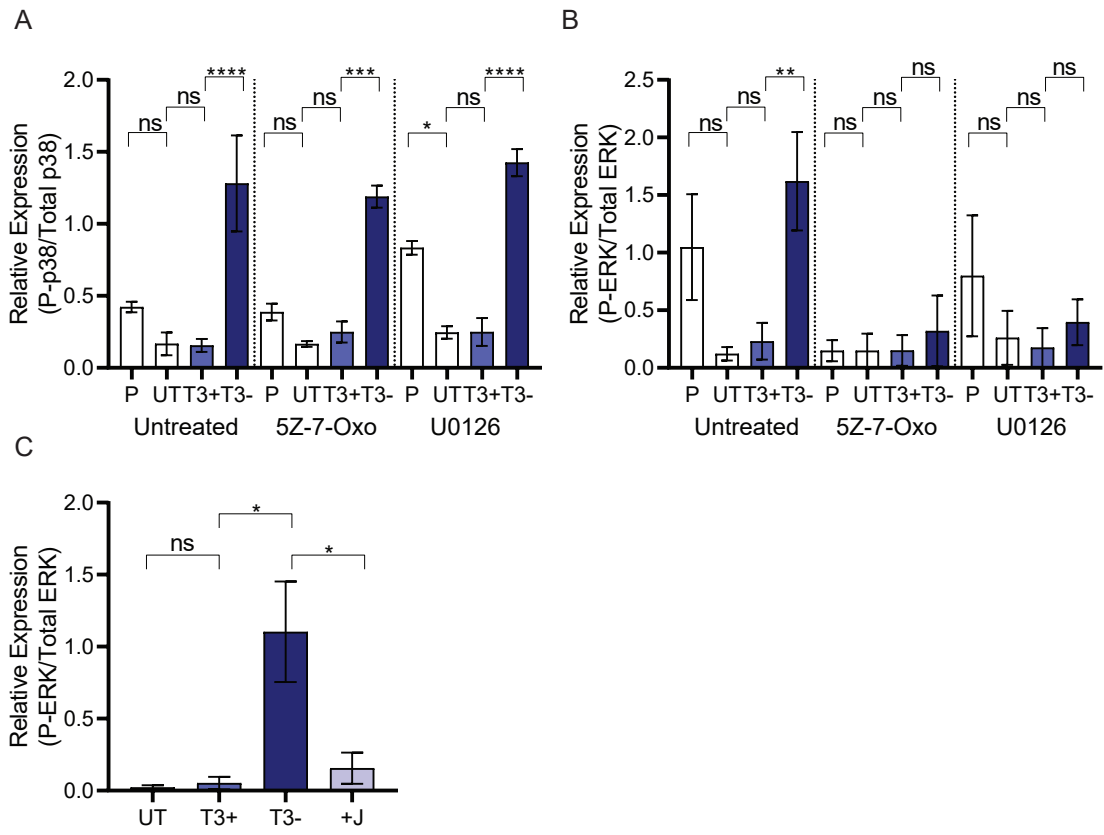

**Supplemental Figure 2. Quantification of p38 and ERK phosphorylation.**  $8 \times 10^6$  human neutrophils were infected with *Y. pestis* KIM1001 with or without the pCD1 plasmid encoding the T3SS (T3+ or T3-, respectively); MOI = 100. (A) Mean relative expression phosphorylated p38 or (B) phosphorylated ERK during infection with indicated strains after pre-treatment with vehicle control (Untreated), the TAK1 inhibitor (5Z)-7-Oxozeaenol ((5Z)-7-Oxo), or the ERK inhibitor U0126. (C) Mean relative expression of phosphorylated ERK during infection with indicated *Y. pestis* strains. *Y. pestis* KIM1001 = T3+; KIM1001 T3<sup>(-)</sup> = T3-; KIM1001 expressing only *yopJ* = +J; Uninfected = UT. Mean  $\pm$ SEM from 3 biologically independent experiments. One-way ANOVA with Sidak's post-hoc; ns= not significant, \*= $p < 0.05$ .
